# Supplementary material
Source: PubMed Central journal article supplement (PMC7347659)
Supplement: 41906_2020_761_MOESM1_ESM.pdf [file 41906_2020_761_MOESM1_ESM.pdf]

## Literatur

### zum Beitrag „Wie erleben Pflegefachpersonen die Corona-Pandemie?“

von Jessica Rheindorf, Johanna Blöcker, Claudia Himmel, Andrea Trost

*PflegeZeitschrift* (73) 8/2020, S. 50-53

Bai Y, Lin CC, Lin CY, Chen JY, Chue CM, Chou P (2004) Survey of stress reactions among health care workers involved with the SARS outbreak. *Psychiatr. Ser.* 55(9):1055-1057

Breyer B, Bluemke M (2016) Deutsche Version der Positive and Negative Affect Schedule PANAS (GESIS Panel). Zusammenstellung sozialwissenschaftlicher Items und Skalen (ZIS). <https://doi.org/10.6102/zis242> (letzter Zugriff am 28.06.2020)

Burns N, Grove SK. (Hrsg.) (2005) *Pflegeforschung verstehen und anwenden*. Elsevier, München

Chua SE, Cheung V, Cheung Ch, MCAlonan GM, Wong, MMC, ..., Tsang KWT. Psychological Effects of the SARS Outbreak in Hong Kong on High-Risk Health Care Workers. *Can J Public Health.* 2004; 49(6):391-393

Dilling H, Mombour W, Schmidt MH (2005) *Internationale Klassifikation psychischer Störungen*. Hogrefe, Göttingen

Hanink E (2018) Nursing during the Spanish flu epidemic of 1918. Verfügbar unter: <http://www.workingnurse.com> (letzter Zugriff am 05.06.2020)

Horowitz MJ. (2001) *Stress response syndromes*. Jason Aronson, New Jersey

Jianbo I, Simeng Ma, Ying W, Zhongxiang C, Jianbo H, ..., Haohua H (2020) Factors associated with mental health outcomes among health care workers exposed to coronavirus disease 2019. *JAMA Network Open.* 2020; 3(3):e:203976

Mamidipalli Sai S, Sree Karthik P, Supriya M (2020) Mental health problems faced by healthcare workers due to the COVID-19 pandemic—A review. *Asian Journal of psychiatry.* 51, 102-119

Maunder R, Leszcz M, Savage, D, Dama MA, Peladeau N, ..., Schulmann B (2008) Applying the Lessons of SARS to Pandemic Influenza: An Evidence-Based Approach to Mitigating the Stress Experienced by Healthcare Workers. *Can J Public Health.* 99(6):486-8

Maunder R, Hunter, J, Vincent L et al. (2003) The immediate psychological and occupational impact of the 2003 SARS outbreak in a teaching hospital. *CMAJ.* 168(10):1245-1251

Walton M, Murray E, Christian MD (2020) Mental health care for medical staff and affiliated healthcare workers during the COVID-19 pandemic. *European Heart Journal: Acute Cardiovascular Care.* 9(3):241–247

Wang S, Xie L, Xu Y, Yu S, Yao B, Xiang D (2020) Sleep disturbances among medical workers during the outbreak of COVID-2019. *Occupational Medicine*; doi:10.1093/occmed/kqaa074
